# Supplementary material for: Cross-species comparisons reveal resistance of human skeletal stem cells to inhibition by non-steroidal anti-inflammatory drugs
Source: PubMed Central journal article supplement (PMC9454294; doi:10.3389/fendo.2022.924927), 2022-08-25
Supplement: Image_1.pdf [file Image_1.pdf]

# Supplemental Figure 1

(A)

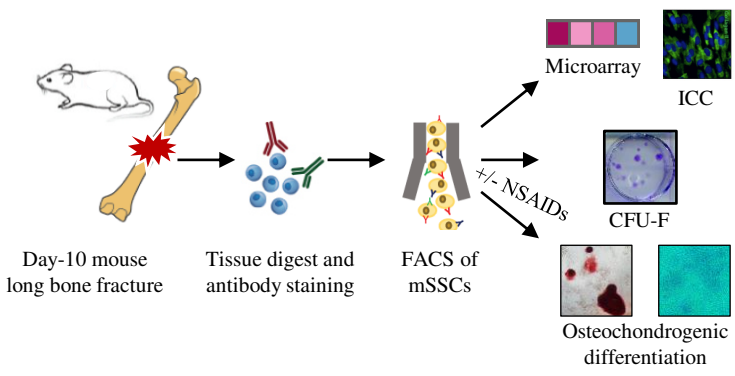

(B)

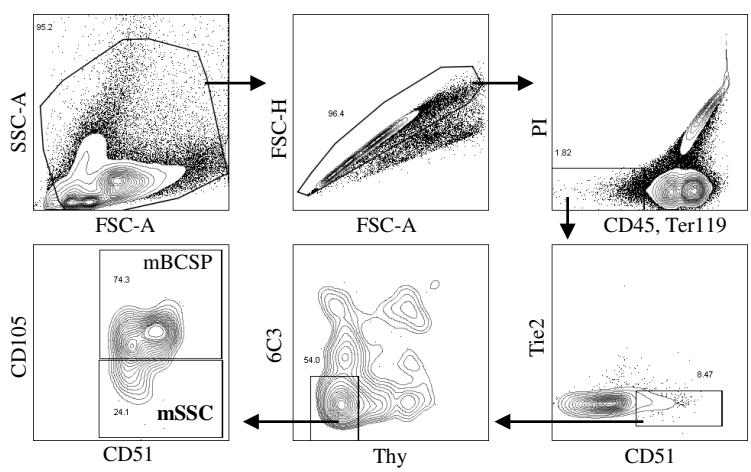

(C)

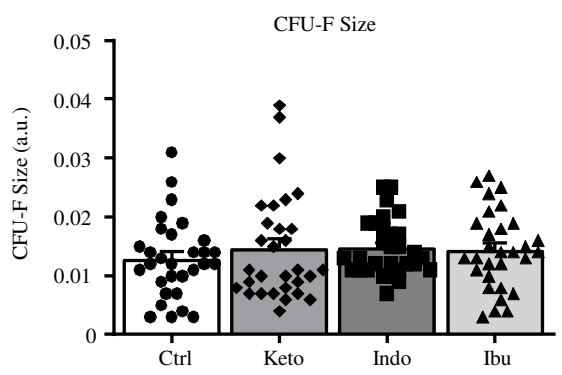

**Supplemental Figure 1: Probing in vitro NSAID effects on mouse SSC function.** (A) Schematic of tissue processing, SSC isolation, and performed in vitro assays. (B) Representative gating strategy for the isolation of fracture derived human SSCs. (C) Quantification of CFU-F size (a.u.: arbitrary unit; n=30 per group from three independent replicates). Data shown as mean + standard error of mean (SEM). Statistical testing versus control group by unpaired Student's t-test.
