# Supplementary material for: Cross-species comparisons reveal resistance of human skeletal stem cells to inhibition by non-steroidal anti-inflammatory drugs
Source: PubMed Central journal article supplement (PMC9454294; doi:10.3389/fendo.2022.924927), 2022-08-25
Supplement: Image_3.pdf [file Image_3.pdf]

# Supplemental Figure 3

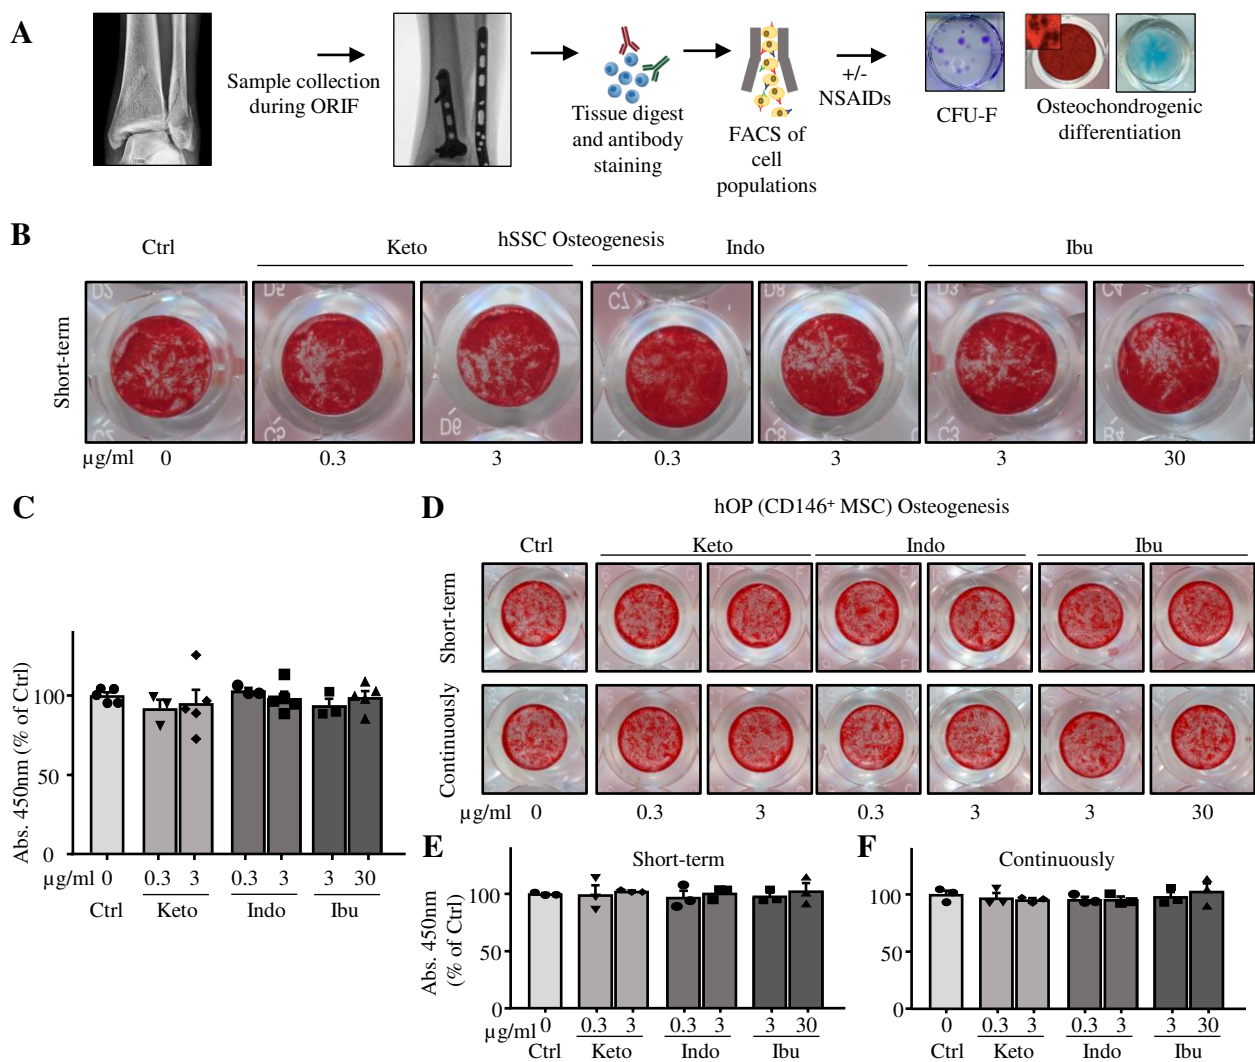

**Supplemental Figure 3: NSAIDs do not alter in vitro osteogenesis of human osteoprogenitors (hOPs).** (A) Schematic of isolation of cells from fracture samples and in vitro assays performed. (B) Representative images of osteogenesis assays of fracture derived hSSCs stained with Alizarin Red S differentiated in the absence or presence of NSAIDs for the first three days (short-term) of osteogenesis. (C) Quantification of short-term NSAID-treated hSSC osteogenesis. n=3-6 individual replicates of donor hSSCs. (D) Representative images of osteogenesis assays of fracture derived hOPs stained with Alizarin Red S differentiated in the absence or presence of NSAIDs for short-term or the whole course (continuous) of osteogenesis. (E) Quantification of short-term NSAID-treated hOP osteogenesis. n=3 individual replicates of donor hSSCs. (F) Quantification of continuously NSAID-treated hOP osteogenesis. n=3 individual replicates of donor hSSCs. All data shown as mean + SEM. Results from at least two independent experiments. Statistical testing versus control group by unpaired Student's t-test with Welch's correction for unequal variances where necessary.
