# Supplementary material for: Cross-species comparisons reveal resistance of human skeletal stem cells to inhibition by non-steroidal anti-inflammatory drugs
Source: PubMed Central journal article supplement (PMC9454294; doi:10.3389/fendo.2022.924927), 2022-08-25
Supplement: Image_4.pdf [file Image_4.pdf]

# Supplemental Figure 4

(A)

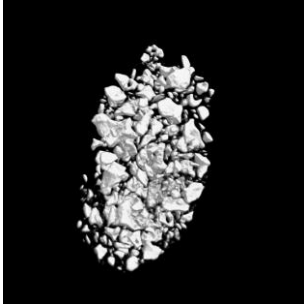

(B)

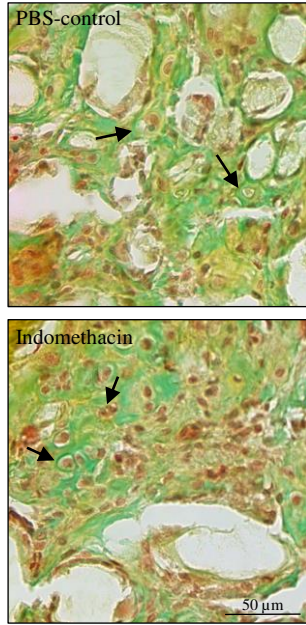

(C)

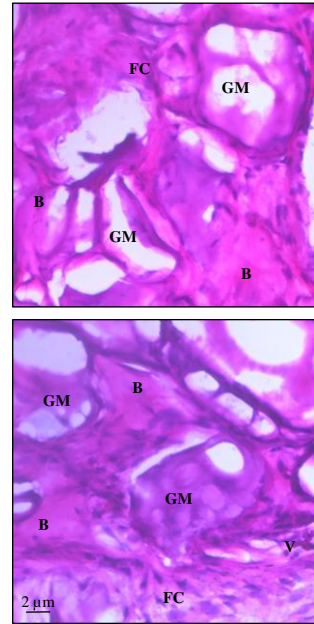

**Supplemental Figure 4: In vivo human SSC bone formation proceeds at least in part through a cartilage intermediate.** (A) Micro-CT image of 8-week-old control graft showing lack of mineralization between InterOss graft material. (B) Movat's Pentachrome staining of 4-week human SSC-derived grafts staining cartilage in blue. Arrows pointing at phenotypic chondrocyte. (C) Representative higher magnification H&E staining of sectioned 8-week grafts (B: Bone; FC: Fibrocartilage; V: Blood vessel; GM: Graft material).
